# Supplementary material for: A spiro-type ammonium based switchable dielectric material with two sequential reversible phase transitions above room temperature
Source: Royal Society of Chemistry journal article supplement (doi:10.1039/c6ra14157a), 2016-01-01
Supplement: c6ra14157a1.pdf [file c6ra14157a1.pdf]

## Supporting Information for

### A spiro-type ammonium based switchable dielectric material with two sequential reversible phase transitions above room temperature

*Xiao-Li Wang, Lin Zhou, Qiong Ye\*, Fu-Juan Geng, Heng-Yun Ye, Da-Wei Fu\* and Yi Zhang*

Ordered Matter Science Research Center, Southeast University, Nanjing, 211189, P.R. China

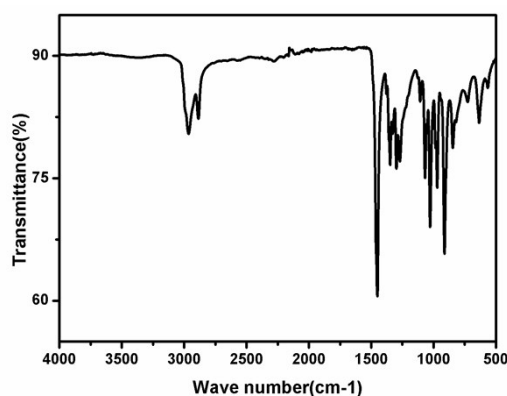

**Fig. S1** IR spectrum of compound **1** measured on a KBr-diluted pellet at room temperature.

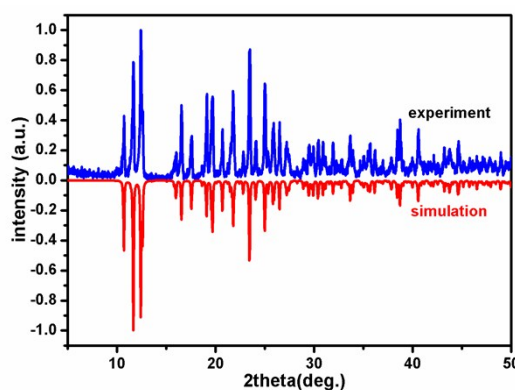

**Fig. S2** PXRD patterns of compound **1** based on the experiment data (blue line) and the simulation data (red line) at room temperature.

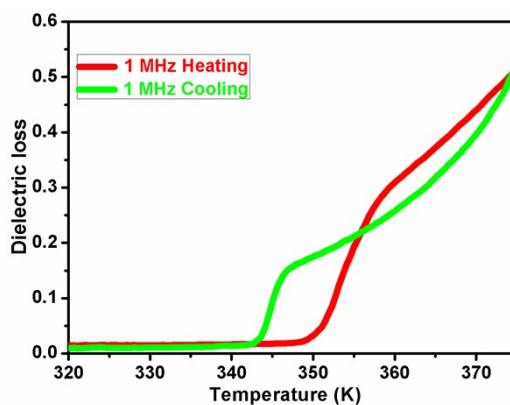

**Fig. S3** Dielectric loss of the dielectric permittivity of compound **1** measured on a power sample in the heating-cooling cycles at 1 MHz.

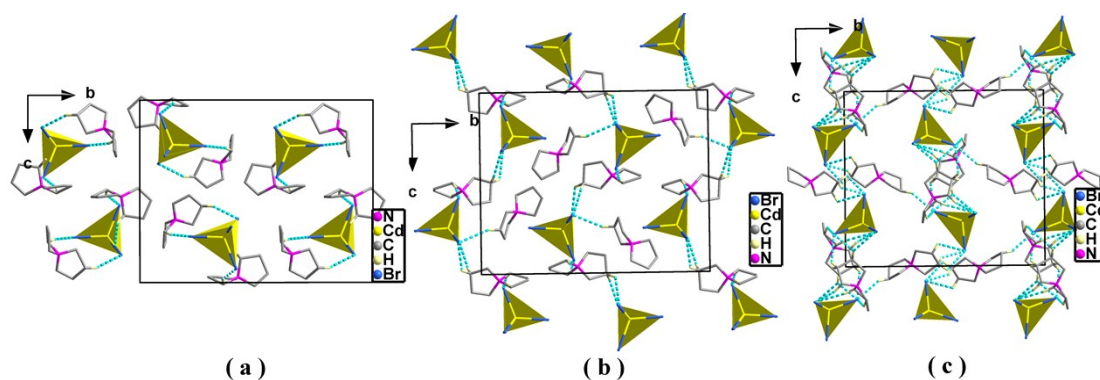

**Fig. S4** Packing diagrams of compound **1** viewed down the *c* axis, with the weak hydrogen bonds shown as dashed lines. The hydrogen atoms not involved in any hydrogen-bonding interactions are omitted for clarity.

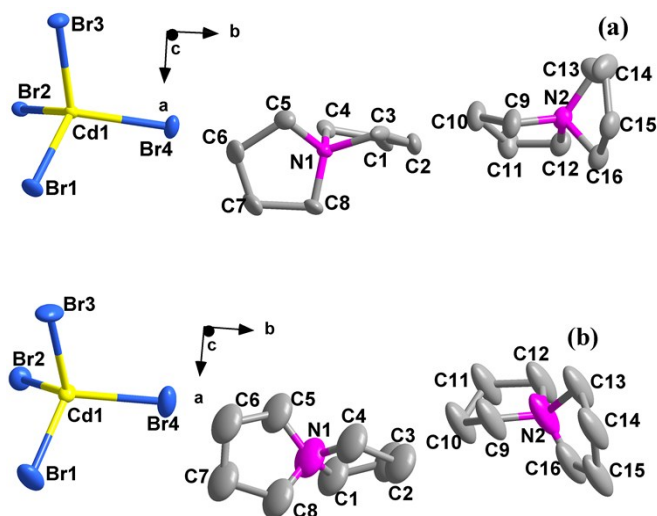

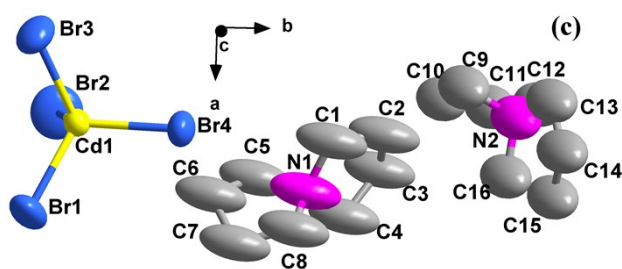

**Fig. S5** View of the asymmetric units of compound **1** obtained at (a) 293, (b) 348, (c) 365 K showing the atomic numbering scheme. Displacement ellipsoids are drawn at the 10% probability level. C atoms are labeled to see more clearly.

**Table S1** Parameters of the weak hydrogen bonds for compound **1** at 293, 348 and 365K.

|             | D—H···A(Å)     | H···A(Å) | D···A(Å) | D—H···A(°) |
|-------------|----------------|----------|----------|------------|
| RTP (293 K) | C5—H5A···Br2   | 2.897    | 3.803    | 156.1      |
|             | C4—H4B···Br3   | 2.986    | 3.859    | 150.2      |
|             | C10—H10A···Br1 | 3.013    | 3.907    | 153.6      |
|             | C16—H16A···Br4 | 3.011    | 3.970    | 169.9      |
| ITP (348 K) | C2—H2A···Br1   | 2.794    | 3.709    | 158.1      |
|             | C2—H2B···Br3   | 2.922    | 3.655    | 133.0      |
|             | C8—H8B···Br2   | 2.866    | 3.820    | 168.0      |
|             | C5—H5B···Br2   | 2.857    | 3.748    | 153.2      |
|             | C15—H15A···Br1 | 2.652    | 3.552    | 155.1      |
| HTP (365 K) | C6—H6A···Br2   | 2.413    | 2.610    | 90.5       |
|             | C6—H6B···Br2   | 2.092    | 2.610    | 111.5      |
|             | C7—H7A···Br2   | 2.989    | 3.309    | 100.9      |
|             | C3—H3A···Br4   | 2.458    | 3.260    | 139.1      |
|             | C9—H9B···Br3   | 2.965    | 3.458    | 112.9      |
|             | C16—H16B···Br1 | 3.007    | 3.930    | 158.6      |
|             | C15—H15B···Br4 | 2.636    | 3.387    | 134.3      |
|             | C11—H11A···Br3 | 2.933    | 3.768    | 144.5      |
|             | C10—H10A···Br4 | 2.962    | 2.931    | 78.7       |
|             | C10—H10B···Br4 | 2.693    | 2.931    | 94.6       |
|             | C11—H11A···Br4 | 2.369    | 2.692    | 98.5       |
|             | C11—H11B···Br4 | 2.516    | 2.692    | 89.7       |
